# Supplementary material for: A unique space confined strategy to construct defective metal oxides within porous nanofibers for electrocatalysis
Source: Royal Society of Chemistry journal article supplement (doi:10.1039/d0ee02815k), 2020-01-01
Supplement: d0ee02815k1.pdf [file d0ee02815k1.pdf]

## Supporting Information

### **A unique space confined strategy to construct defective metal oxides within porous nanofibers for electrocatalysis**

Qi Hu<sup>#</sup>, Ziyu Wang<sup>#</sup>, Xiaowan Huang, Yongjie Qin, Hengpan Yang, Xiangzhong Ren, Qianling Zhang, Jianhong Liu, Chuanxin He

## **Experimental Section**

### **Synthesis of D-CoNiO<sub>x</sub>-NFs**

The CoNi-PBAs cubes were synthesized in advance according to literatures. The CoNi-PBAs were then employed as precursors to craft D-CoNiO<sub>x</sub>-NFs via an electrospinning technology. In a typical process, 1.0 g polyacrylonitrile (PAN, Mw=150000 g mol<sup>-1</sup>) was completely dissolved in 14 ml *N,N*-dimethylformamide (DMF) under vigorously stirring for 24 h, in which CoNi-PBAs (1.0 g) was added to form a suspension. The obtained suspension was then poured into a syringe with a stainless steel needle at an applied voltage of 18 kV for implementing the electrospinning process. The resulting membranes were dried in vacuum for 12 h, and pre-oxidized at 280 °C for 3 h under air atmosphere. After that, the membranes were calcinated at 500 °C for 2 h to remove the PAN, and the obtained product was denoted

D-CoNiO<sub>x</sub>-NFs. For comparison, we utilized a certain amount of Ni(NO<sub>3</sub>)<sub>2</sub> and Co(NO<sub>3</sub>)<sub>2</sub> to replace CoNi-PBAs without changing the mole fraction of Ni/Co cations in the spinning solution, repeated the above steps, and then obtained CoNiO<sub>x</sub>-NFs (served as control samples).

### **Synthesis of D-CoNiO<sub>x</sub>-P-NFs**

The P elements were doped into D-CoNiO<sub>x</sub>-NFs to generate D-CoNiO<sub>x</sub>-P-NFs by employing sodium hypophosphite (NaH<sub>2</sub>PO<sub>2</sub>) as P sources. In details, D-CoNiO<sub>x</sub>-NFs (0.2 g) and NaH<sub>2</sub>PO<sub>2</sub> (2.4 g) were put into two separated sides of a crucible, which was then calcinated at 250 °C under Ar atmosphere for 0.5 h. In order to optimize the content of P dopants, we altered the amount of NaH<sub>2</sub>PO<sub>2</sub> introduced from 1.2 to 0.8 and 1.6 g for crafting control samples of D-CoNiO<sub>x</sub>-2P-NFs and D-CoNiO<sub>x</sub>-4P-NFs, respectively. For comparison, we also introduced P dopants into CoNiO<sub>x</sub>-NFs through the same process for the synthesis of D-CoNiO<sub>x</sub>-P-NFs, and the obtained product was denoted CoNiO<sub>x</sub>-P-NFs.

### **Characterization**

Crystalline phases of all samples were identified through X-ray diffraction (XRD) experiments at a 2θ range of 10°-80° (D8ADVANCE diffractometer). Morphological properties of the samples were viewed by field emission scanning electron microscope (FESEM) (JEOL JEM-7800F), transmission electron microscopy (TEM)

(JEOL JEM 2100) and high-resolution transmission electron microscopy (HRTEM) (JEOL JEM-F200) with SADE spectrum. Chemical states of different elements were analyzed via X-ray photoelectron spectroscopy (XPS) using a Thermo VG ESCALAB250 X-ray photoelectron spectrometer. The low-temperature N<sub>2</sub> adsorption-desorption tests were performed on a micromeritics ASAP 2020 sorptometer. X-ray absorption fine structure spectroscopy (XAFS) of Co K-edge and Ni K-edge were recorded at 1W1B station in Beijing Synchrotron Radiation Facility (BSRF). The storage rings of BSRF was operated at 2.5 GeV with a maximum current of 250 mA. All XAFS data was collected in a transmission mode using ionization chamber under ambient conditions.

### **Electrochemical measurements**

All electrochemical measurements were performed on an electrochemical workstation (CHI 760 E) using a three-electrode system that contains a Hg/HgO (in 1 M KOH) as reference electrode, a carbon rod as counter electrode, and a glassy carbon electrode (0.07 cm<sup>2</sup>) as working electrode. OER and HER were performed under O<sub>2</sub>- and Ar-saturated 1 M KOH, respectively. All LSVs were recorded at a scan rate of 5 mV s<sup>-1</sup>. The electrocatalysts inks were prepared through dispersing a certain amount of electrocatalysts in a mixed solution of ethanol (49 μL), deionized water (150 μL), and Nafion (9 μL) under a sonication bath for 30 min. The potentials of all LSV were converted into a reversible hydrogen electrode (RHE) according to the equation: “ $E \text{ (RHE)} = E \text{ (Hg/HgO)} + 0.098 + 0.059 \times \text{pH}$ ”. All potentials were

recorded after being calibrated IR-compensations. Electrochemical impedance spectroscopy (EIS) were tested over a frequency range from 1 MHz to 1 Hz. According to cyclic voltammetry (CV) sweeps over a faraday current-free region at various scan rates, we determined the electrochemically active surface area (ECSA) of different samples. The Tafel plots were drawn through fitting the linear range of the overpotential ( $\eta$ ) and log current densities ( $\log j$ ), based on the equation of  $\eta = b \log(j) + a$ , where  $b$  is the Tafel slope

The overall water-splitting performance was measured on a two-electrode system by serving the nickel foams with electrocatalysts (mass loading: 1 mg cm<sup>-2</sup>) as both cathode and anode. The overall water splitting durability was accessed by recording the current density at a constant voltage for 20 h.

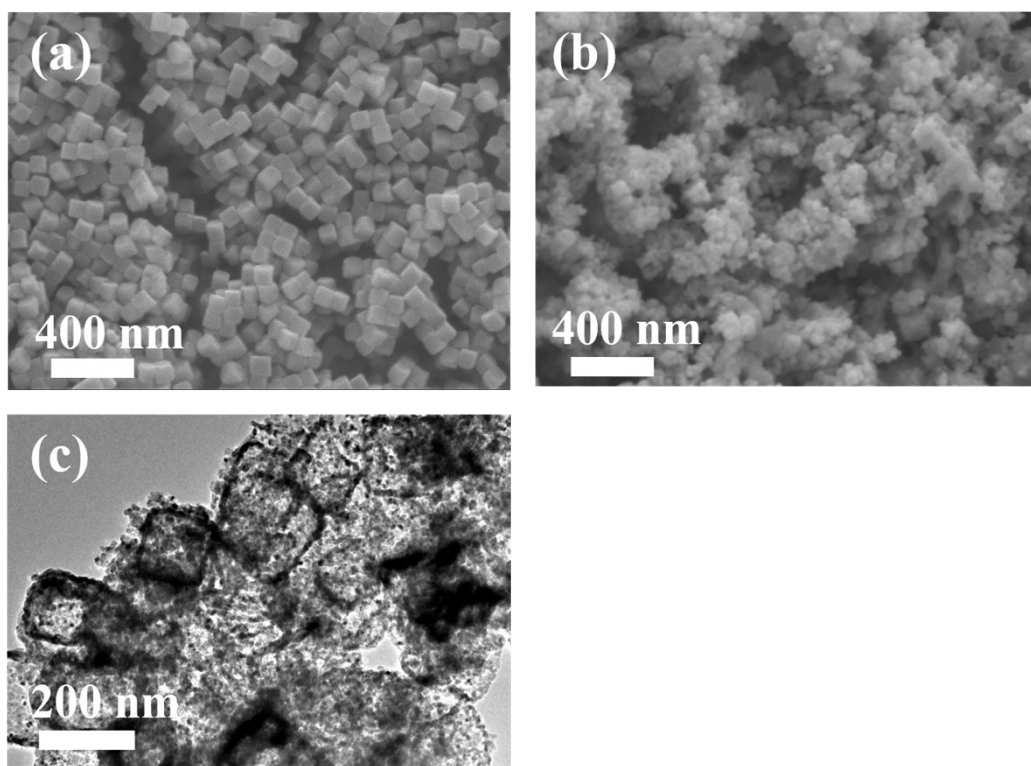

**Figure S1** (a) SEM images of pure CoNi-PBAs cubes with PAN. (b) SEM and (c) TEM images of CoNi-PBAs cubes after the calcination at 500 °C in air for 2 h.

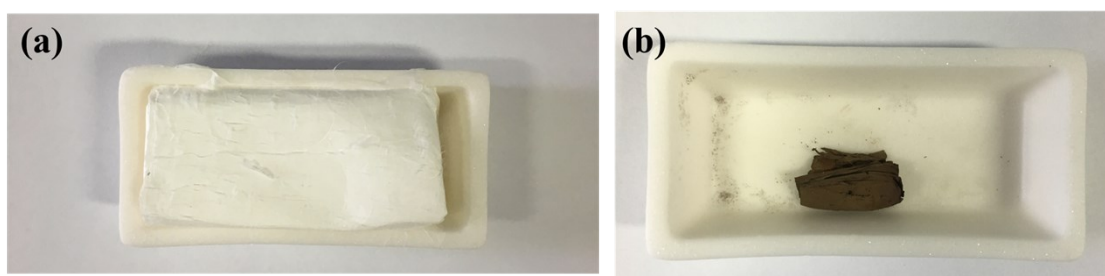

**Figure S2** Optical photos of pure PAN nanofiber membrane without CoNi-PBAs (a) before and (b) after the calcination at 500 °C in air for a short time of 0.5 h.

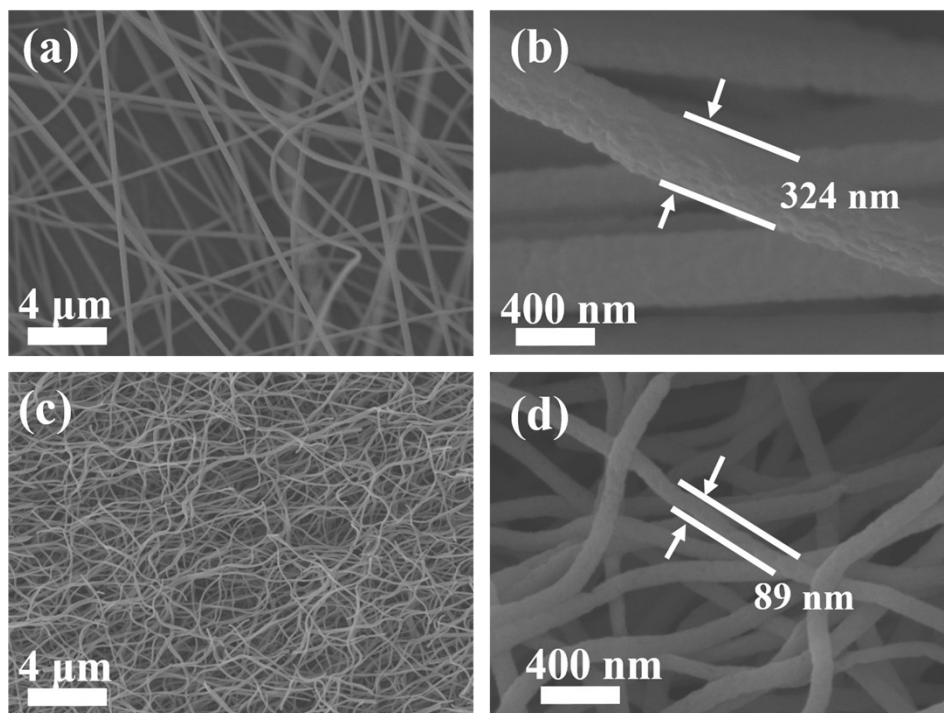

**Figure S3** SEM images pure PAN nanofiber membrane (a, b) before and (c, d) after the calcination at 500 °C in air for a short time of 0.5 h.

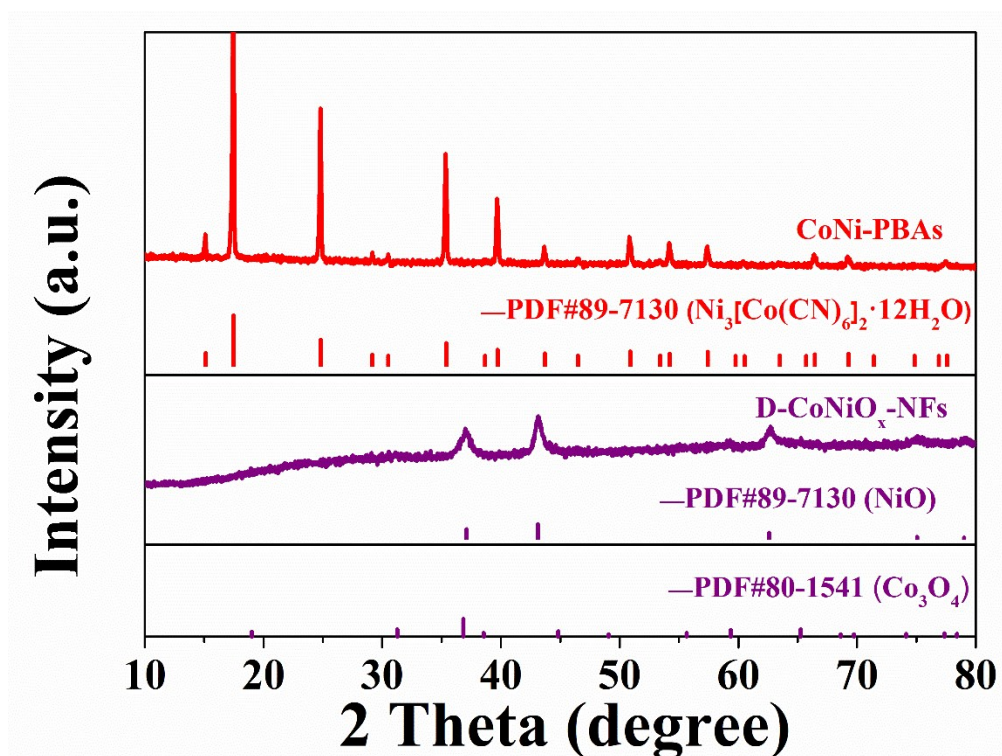

**Figure S4** XRD patterns of CoNi-PBAs and D-CoNiO<sub>x</sub>-NFs.

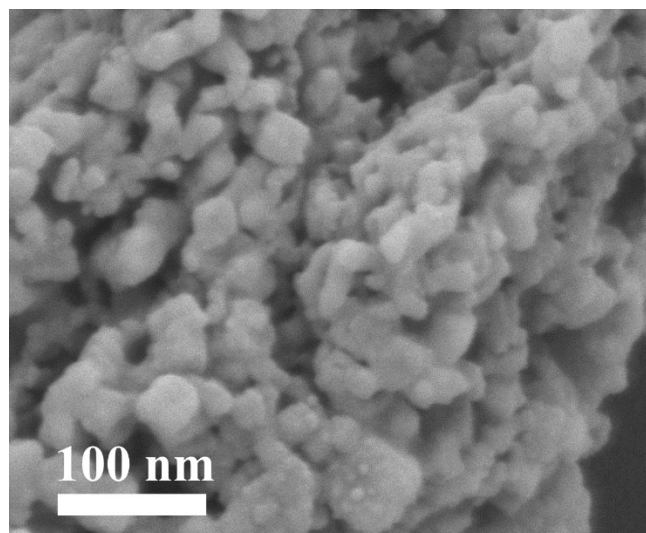

**Figure S5** SEM images of D-CoNiO<sub>x</sub>-NFs, which was prepared through the calcination of CoNi-PBAs@PAN-NFs at 500 °C in air for 2 h.

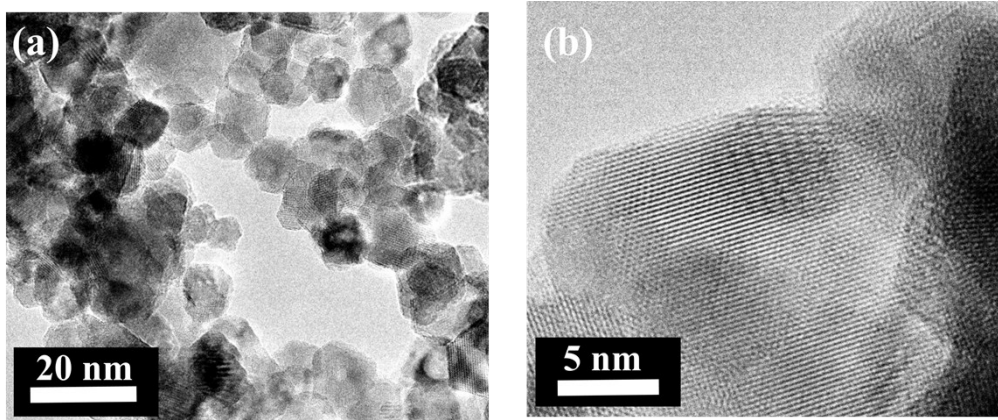

**Figure S6** (a) TEM and (b) HRTEM images of  $\text{CoNiO}_x$ , which was synthesized pure  $\text{CoNi-PBAs}$  without PAN.

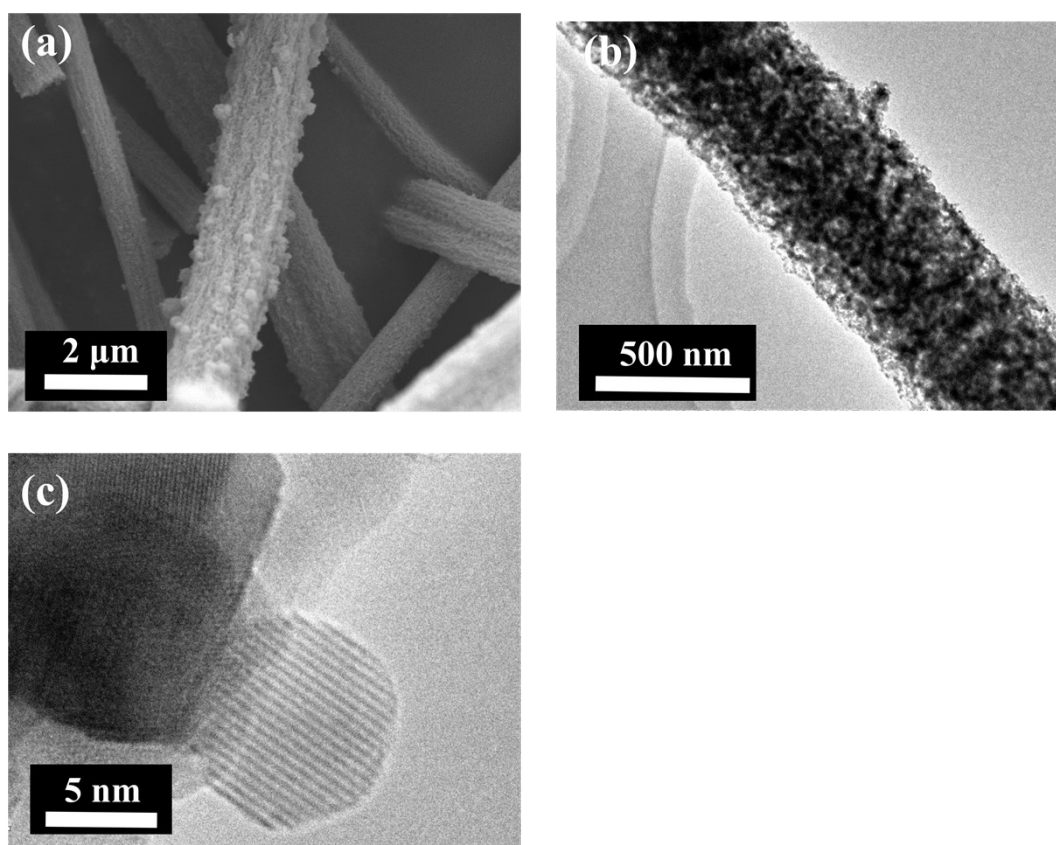

**Figure S7** (a) SEM, (b) TEM, and (c) HRTEM images of  $\text{CoNiO}_x\text{-NFs}$ .



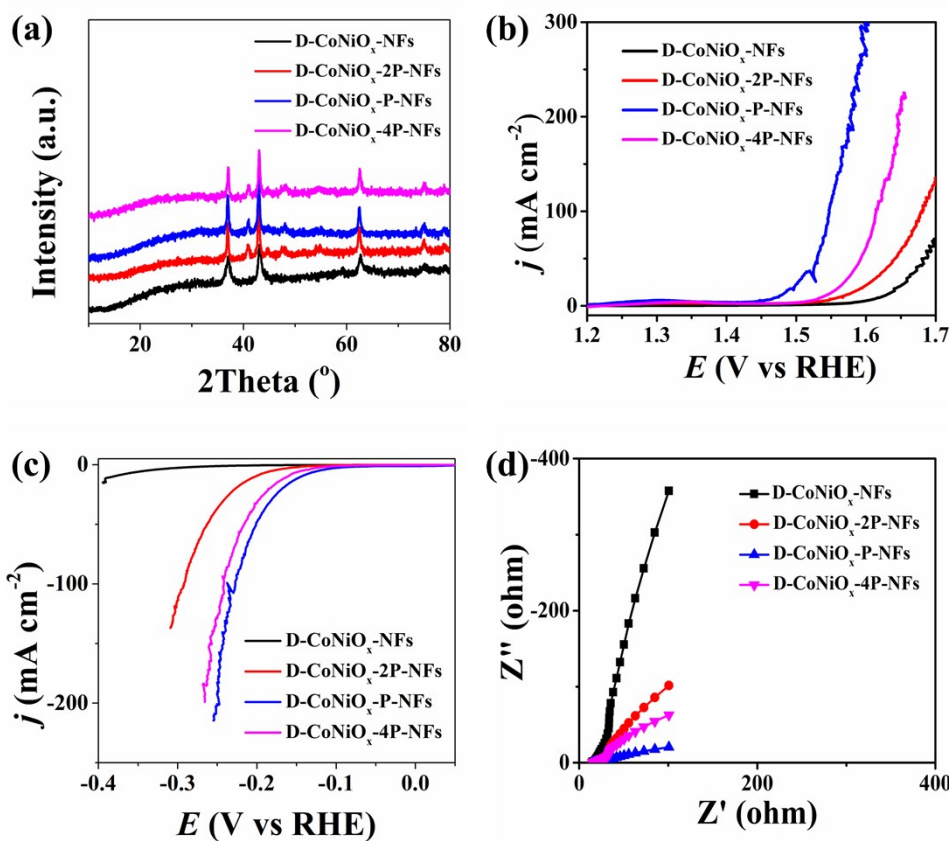

**Figure S8** (a) XRD patterns of D-CoNiO<sub>x</sub>-NFs, D-CoNiO<sub>x</sub>-2P-NFs, D-CoNiO<sub>x</sub>-P-NFs, and D-CoNiO<sub>x</sub>-4P-NFs with different amount of P dopants. LSV of (b) OER and (c) HER for above noted four electrocatalysts. (d) EIS Nyquist plots of electrocatalysts for OER at the overpotential of 300 mV.

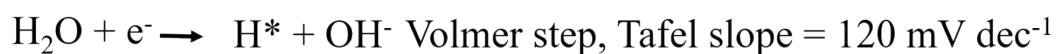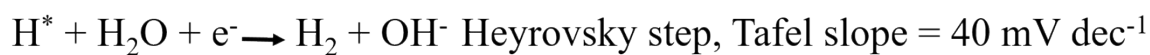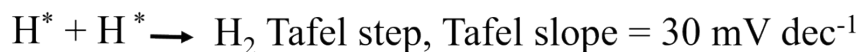

**Figure S9** Reaction processes of HER in alkaline media, and Tafel slope values for every step of HER.<sup>[S1]</sup>

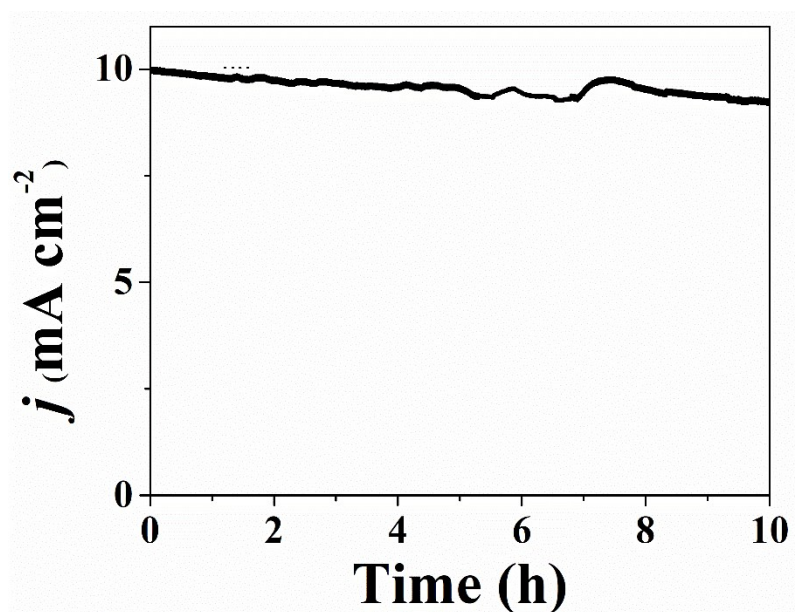

**Figure S10** Stability test of D-CoNiO<sub>x</sub>-P-NFs for OER at 10 mA cm<sup>-2</sup>.

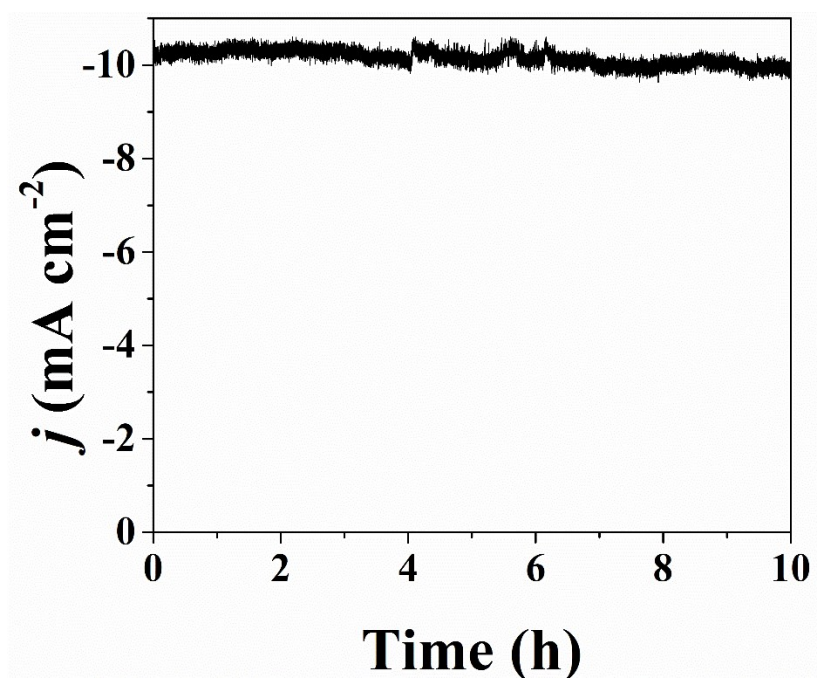

**Figure S11** Stability test of D-CoNiO<sub>x</sub>-P-NFs for HER at 10 mA cm<sup>-2</sup>.

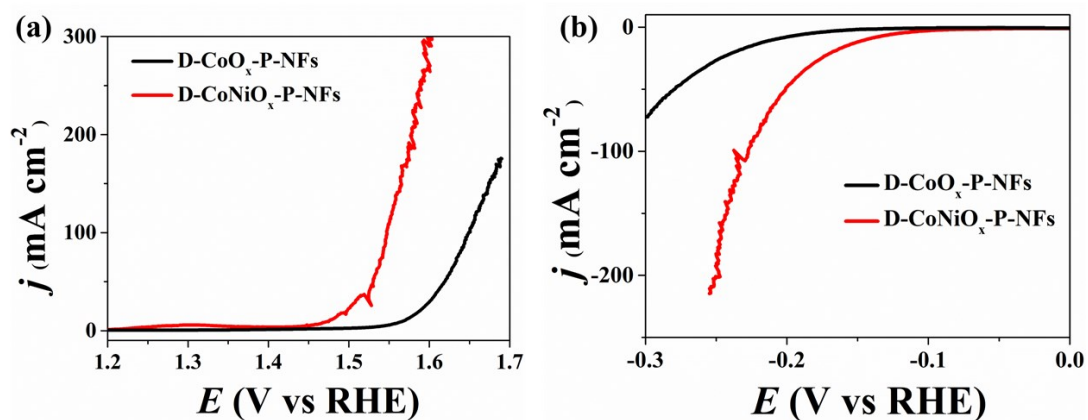

**Figure S12** LSV profiles of D-CoO<sub>x</sub>-P-NFs and D-CoNiO<sub>x</sub>-P-NFs for (a) OER and (b) HER in 1 M KOH

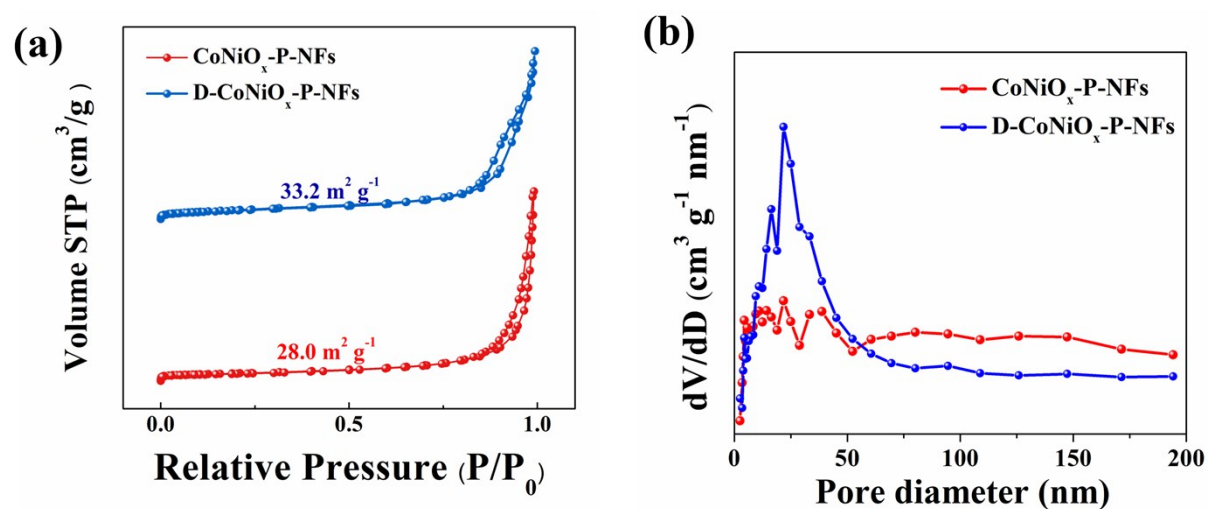

**Figure S13** (a) N<sub>2</sub> adsorption-desorption isotherms and corresponding pore distribution of CoNiO<sub>x</sub>-P-NFs and D-CoNiO<sub>x</sub>-P-NFs.

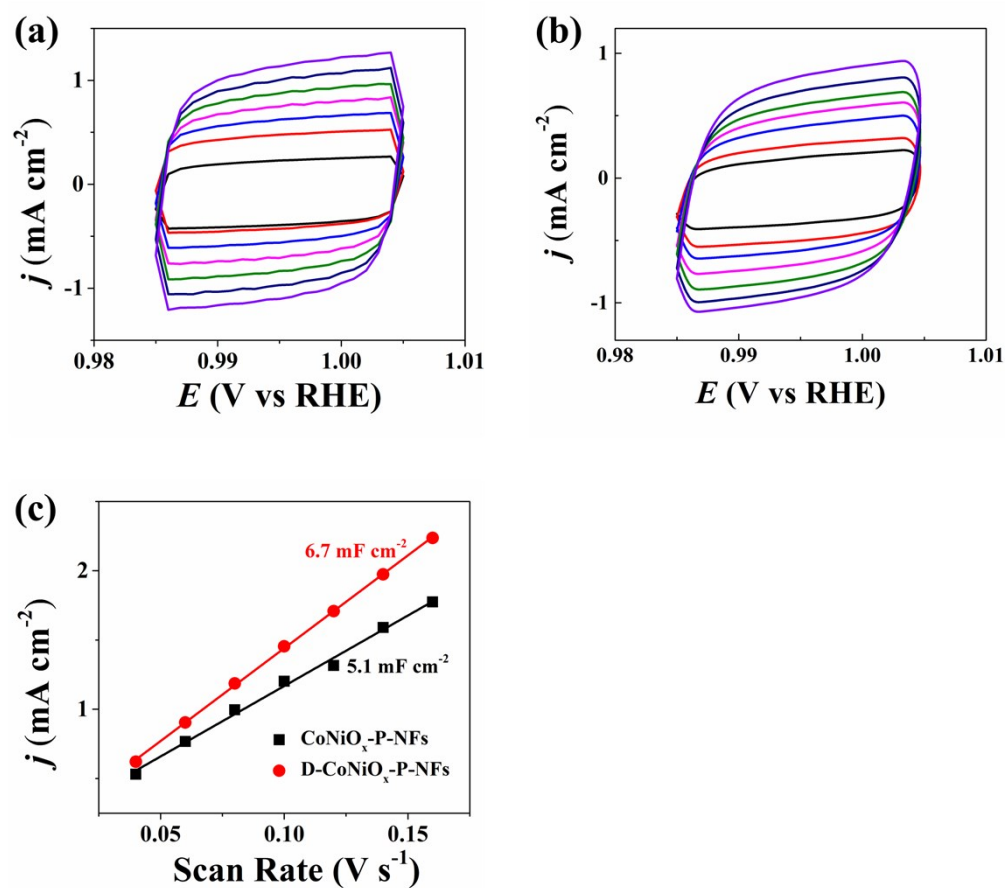

**Figure S14** CV profiles for (a) CoNiO<sub>x</sub>-P-NFs, (b) D-CoNiO<sub>x</sub>-P-NFs. (c) Current density vs scan rate plots for CoNiO<sub>x</sub>-P-NFs, and D-CoNiO<sub>x</sub>-P-NFs at different scan rates.

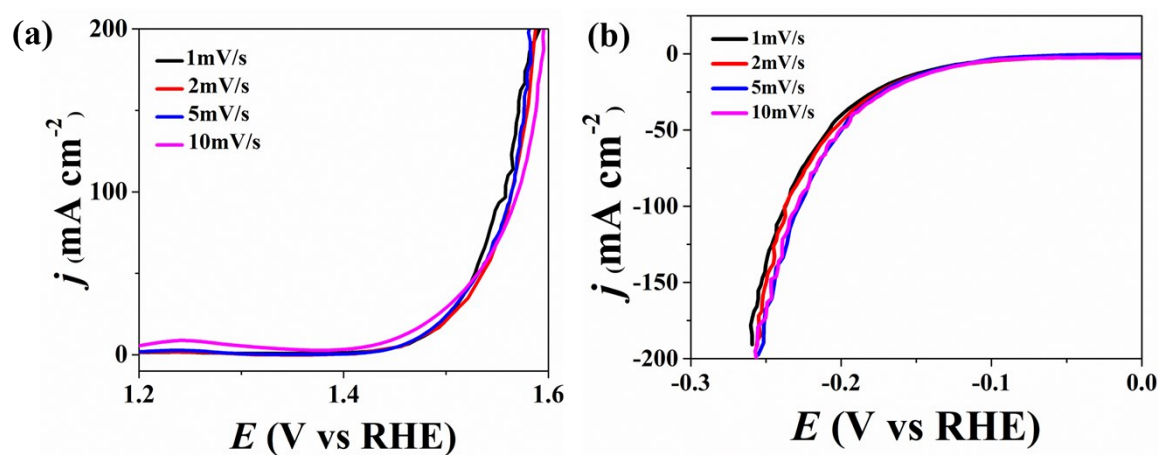

**Figure S15** LSV profiles of D-CoNiO<sub>x</sub>-P-NFs for (a) OER and (b) HER at different scan rates in 1 M KOH

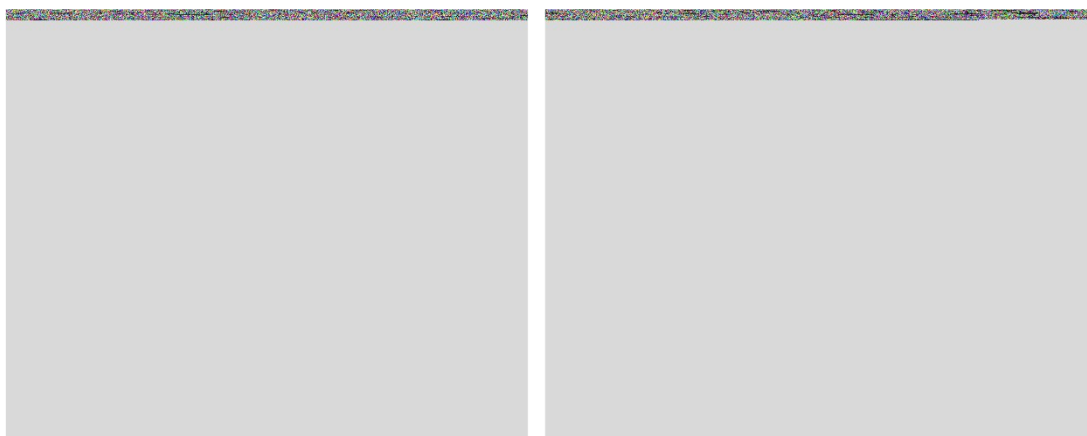

**Figure S16** LSV of (a) OER and (b) HER for CoNiO<sub>x</sub>-P-NFs and D- CoNiO<sub>x</sub>-P-NFs after normalizing by ECSA.

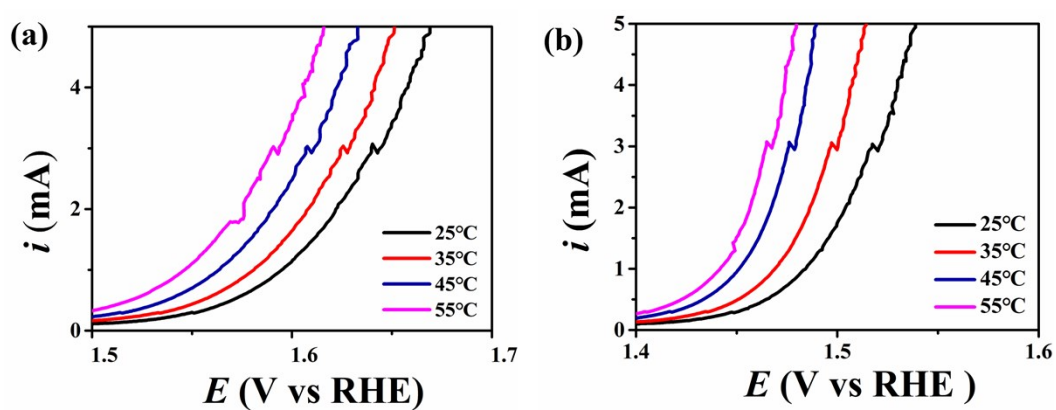

**Figure S17** LSV of OER for (a) CoNiO<sub>x</sub>-P-NFs, (b) D-CoNiO<sub>x</sub>-P-NFs at different temperatures from 25 to 55 °C.

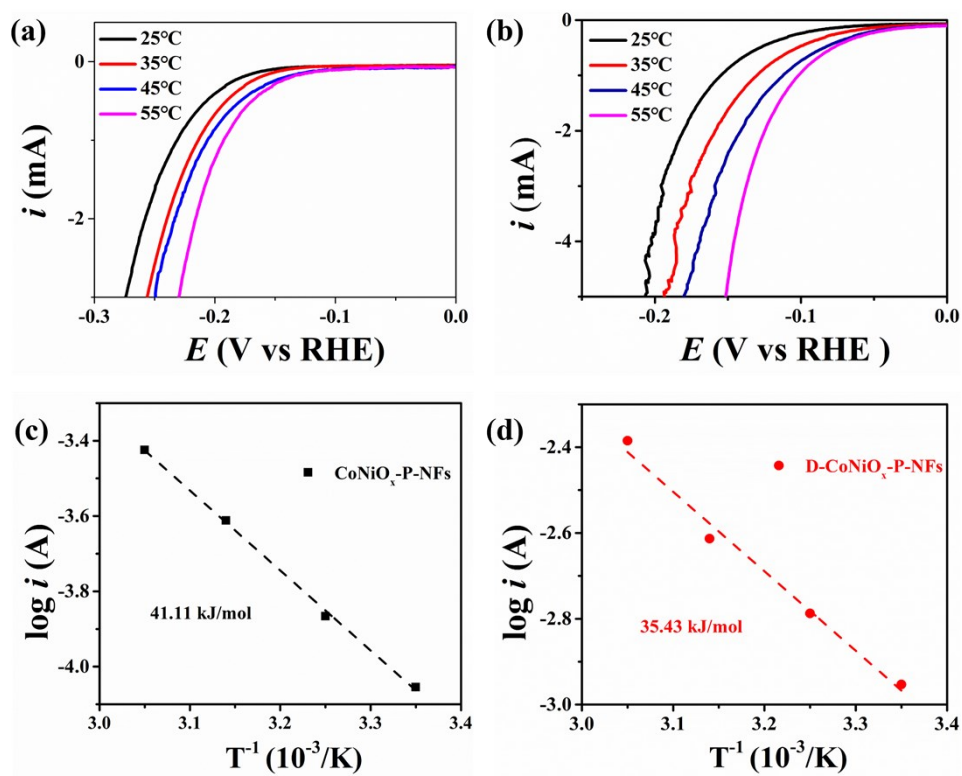

**Figure S18** LSV of HER for (a) CoNiO<sub>x</sub>-P-NFs, and (b) D-CoNiO<sub>x</sub>-P-NFs at different temperatures from 25 to 55 °C. Arrhenius plots of the HER kinetic current on (c) CoNiO<sub>x</sub>-P-NFs, and (d) D-CoNiO<sub>x</sub>-P-NFs at the overpotential of 150 mV.

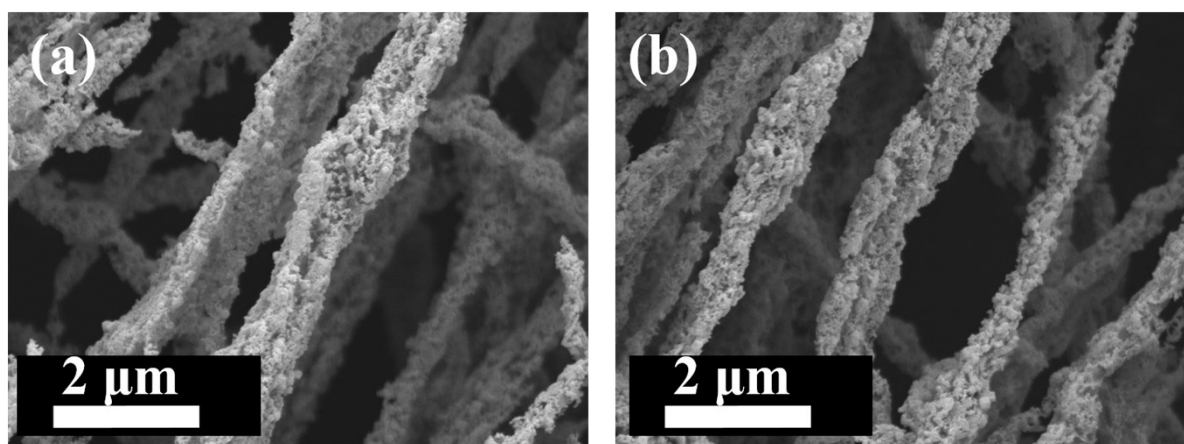

**Figure S19** SEM images D-CoNiO<sub>x</sub>-P-NFs after (a) OER stability and (b) HER stability test.



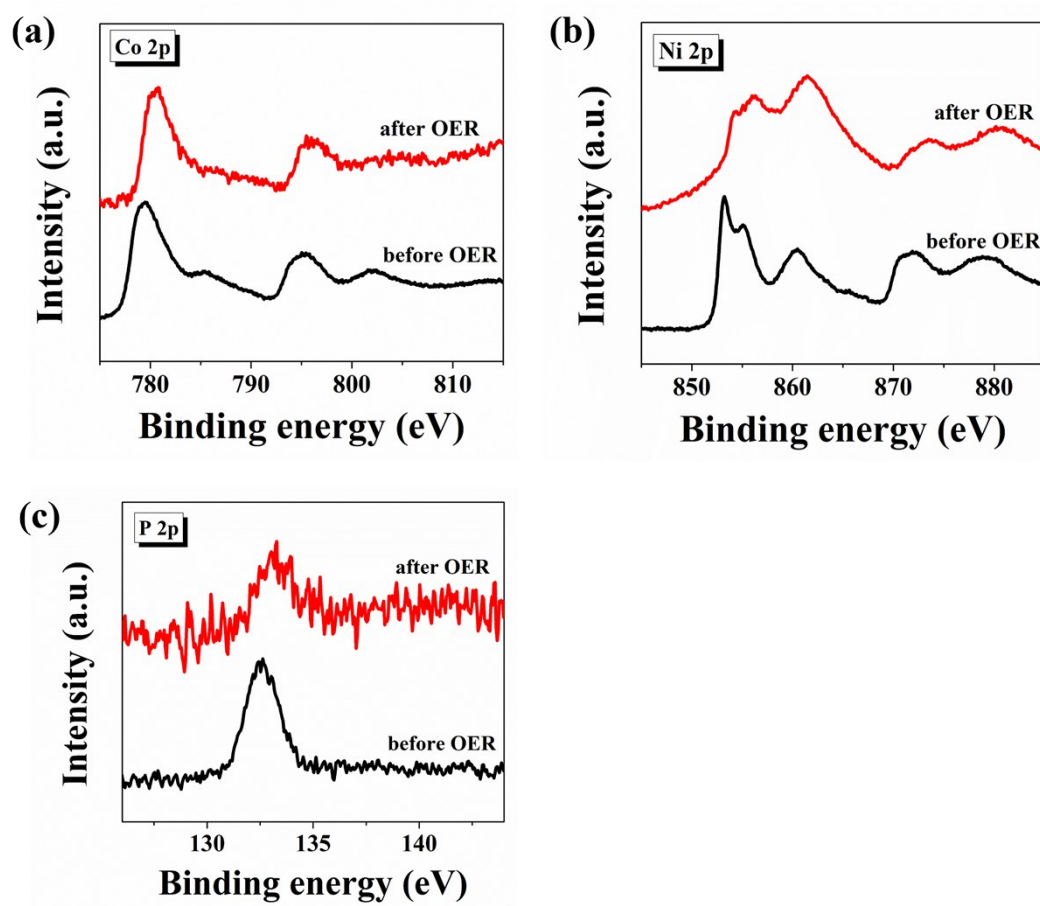

**Figure S20** XPS spectra of (a) Co 2p, (b) Ni 2p, and (c) P 2p for D-CoNiO<sub>x</sub>-P-NFs after OER stability tests.

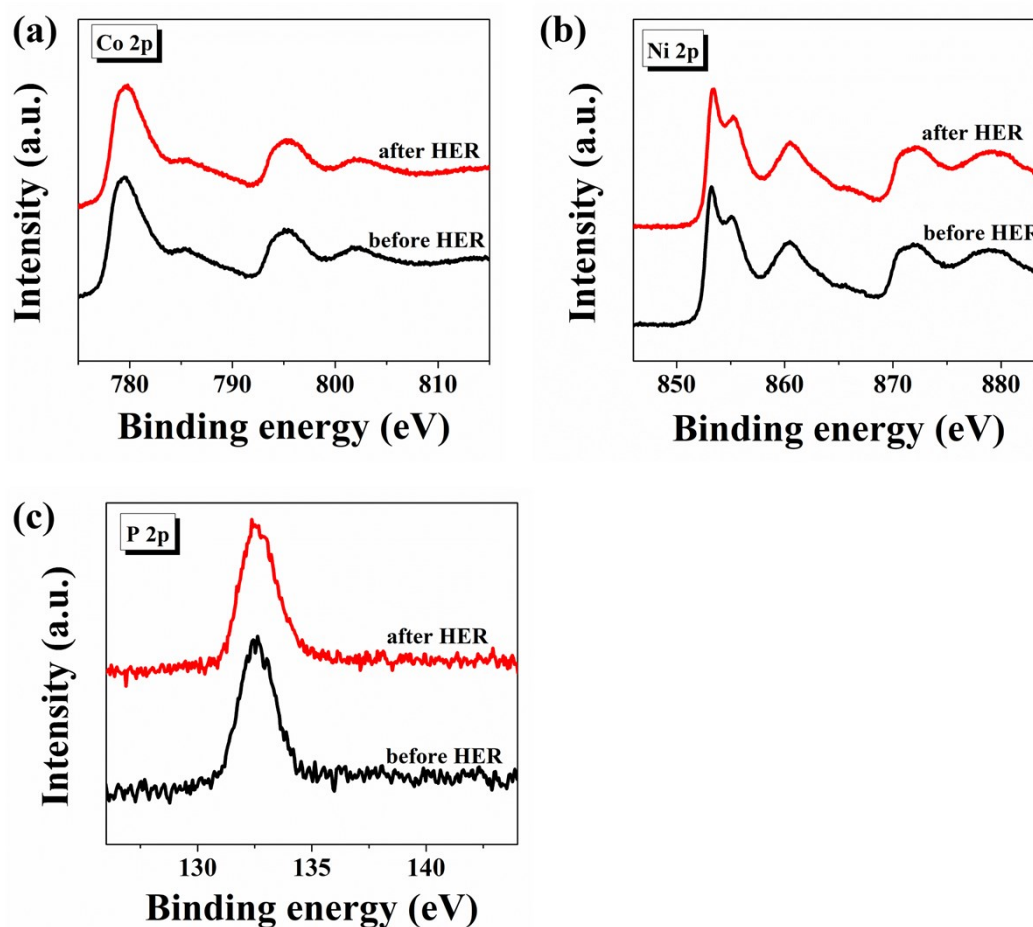

**Figure S21** XPS spectra of (a) Co 2p, (b) Ni 2p, and (c) P 2p for D-CoNiO<sub>x</sub>-P-NFs after HER stability tests.

## References

- [S1] S. Ye, F. Luo, T. Xu, P. Zhang, H. Shi, S. Qin, J. Wu, C. He, X. Ouyang, Q. Zhang, J. Liu, X. Sun, *Nano Energy* **2020**, 68, 104301.
